# Supplementary material for: Mapping the Lineage Relationship between CXCR5+ and CXCR5− CD4+ T Cells in HIV-Infected Human Lymph Nodes
Source: PubMed Central journal article supplement — Cell Rep. Author manuscript; Available in PMC 2019 Nov 26. (PMC6878759; doi:10.1016/j.celrep.2019.08.037), 2019-09-17
Supplement: NIHMS1542908-supplement-1.pdf [file NIHMS1542908-supplement-1.pdf]

**Cell Reports, Volume 28**

**Supplemental Information**

**Mapping the Lineage Relationship  
between CXCR5<sup>+</sup> and CXCR5<sup>-</sup> CD4<sup>+</sup> T Cells  
in HIV-Infected Human Lymph Nodes**

**Daniel Del Alcazar, Yifeng Wang, Chenfeng He, Ben S. Wendel, Perla M. Del Río-Estrada, Jerome Lin, Yuria Ablanedo-Terrazas, Michael J. Malone, Stefany M. Hernandez, Ian Frank, Ali Naji, Gustavo Reyes-Terán, Ning Jiang, and Laura F. Su**

## Supplementary Information

**Title: Mapping the lineage relationship between CXCR5<sup>+</sup> and CXCR5<sup>-</sup> CD4<sup>+</sup> T cells in HIV infected human lymph nodes**

**Authors:** Daniel Del Alcazar, Yifeng Wang, Chenfeng He, Ben S. Wendel, Perla M. Del Río-Estrada, Jerome Lin, Yuria Ablanedo-Terrazas, Michael J Malone, Stefany M. Hernandez, Ian Frank, Ali Naji, Gustavo Reyes-Terán, Ning Jiang, Laura F. Su

Table S1: Clinical characteristics and demographic information of LN and PBMC samples, related to Figures 1-6.

| Donor ID | source   | gender | age (years) | CD4 T cell count (cels/ul) | CD4:CD8 | pVL (copies/ml) | ART       |
|----------|----------|--------|-------------|----------------------------|---------|-----------------|-----------|
| HIV1     | LN, PBMC | M      | 18          | 504                        | 0.71    | DETECTABLE <40  | No        |
| HIV2     | LN, PBMC | M      | 29          | 367                        | 0.35    | DETECTABLE <40  | 7 months  |
| HIV3     | LN       | M      | 22          | 223                        | 0.08    | 280700          | 1 day     |
| HIV4     | LN       | M      | 24          | 6                          | 0.1     | 714,364         | No        |
| HIV5     | LN, PBMC | M      | 26          | 399                        | 1.03    | 9610            | No        |
| HIV6     | LN, PBMC | M      | 22          | 538                        | 0.32    | 9511            | No        |
| HIV7     | LN, PBMC | M      | 20          | 743                        | 0.58    | 83801           | No        |
| HIV8     | LN, PBMC | M      | 22          | 1136                       | 0.72    | 45395           | No        |
| HIV9     | LN       | M      | 19          | 13                         | 0.27    | 621,622         | No        |
| HIV10    | LN       | M      | 33          | 18                         | 0.32    | 75,043          | No        |
| HIV11    | LN       | M      | 28          | 406                        | 0.46    | 61586           | No        |
| HIV12    | LN, PBMC | M      | 23          | 473                        | 0.62    | 208656          | No        |
| HIV13    | LN       | M      | 28          | 564                        | 0.4     | 16647           | No        |
| HIV14    | LN       | M      | 45          | 9                          | 0.1     | 111,403         | No        |
| HIV15    | LN       | M      | 20          | 8                          | 0.14    | 578,155         | No        |
| HIV16    | LN       | M      | 28          | 10                         | 0.17    | 243,150         | No        |
| HIV17    | LN, PBMC | M      | 19          | 157                        | 0.15    | 63              | 3 months  |
| HIV18    | LN, PBMC | M      | 19          | 258                        | 0.41    | 35847           | No        |
| HIV19    | LN, PBMC | M      | 28          | 25                         | 0.41    | 31950           | No        |
| HIV20    | LN, PBMC | M      | 33          | 403                        | 0.44    | 26989           | No        |
| HIV21    | LN       | M      | 20          | 8                          | 0.13    | 5,672,501       | No        |
| HIV22    | LN       | M      | 26          | 16                         | 0.29    | 222428          | No        |
| HIV23    | LN       | M      | 21          | 573                        | 0.6     | 17868           | No        |
| HIV24    | LN       | M      | 35          | 676                        | 0.93    | 25432           | No        |
| HIV25    | LN       | M      | 29          | 152                        | 0.21    | 5915            | 1 month   |
| HIV26    | LN       | M      | 23          | 16                         | 0.29    | 3,034           | No        |
| HIV27    | LN       | M      | 29          | 241                        | 0.22    | 447952          | No        |
| HIV28    | LN, PBMC | M      | 28          | 1086                       | 0.77    | 3964            | No        |
| HIV29    | LN       | M      | 26          | 402                        | 0.31    | 29620           | 1 month   |
| HIV30    | LN       | F      | 20          | 212                        | 0.28    | 136190          | No        |
| HIV31    | LN       | M      | 32          | 159                        | 0.21    | 1,387,603       | No        |
| HIV32    | LN, PBMC | M      | 40          | 668                        | 0.57    | 17247           | No        |
| HIV33    | LN       | M      | 21          | 11                         | 0.18    | 1,227,366.00    | No        |
| HIV34    | LN       | F      | 41          | 7                          | 0.06    | 230948          | 2 months  |
| HIV35    | LN       | F      | 40          | 18                         | 0.3     | 111,854         | No        |
| HIV36    | LN, PBMC | M      | 29          | 295                        | 0.42    | 71              | 36 months |
| HIV37    | LN       | M      | 23          | 9                          | 0.11    | 1,205,036       | No        |
| HIV38    | PBMC     | M      | 46          | 666                        | 1.07    | 9,087.00        | No        |
| HIV39    | LN, PBMC | M      | 37          | 276                        | 0.17    | 199152          | No        |
| HIV40    | LN       | M      | 28          | 22                         | 0.4     | 18,111          | No        |
| HIV41    | LN, PBMC | M      | 38          | 387                        | 0.4     | 71004           | No        |
| HIV42    | PBMC     | M      | 45          | 212                        | NA      | 23065           | No        |
| HIV43    | PBMC     | F      | 45          | 7                          | NA      | 24448           | No        |
| HIV44    | PBMC     | M      | 41          | 336                        | NA      | 19700           | No        |
| HIV45    | LN       | M      | 18          | 192                        | 0.08    | 2,613,622.00    | No        |
| HIV46    | LN       | M      | 21          | 251                        | 0.19    | 1,019,989.00    | No        |
| HIV47    | LN       | M      | 24          | 716                        | 0.51    | 322,442.00      | No        |
| HIV48    | LN       | M      | 27          | 719                        | 0.39    | 49,224.00       | No        |
| HIV49    | LN       | M      | 37          | 832                        | 0.56    | 11,026.00       | No        |
| HIV50    | LN       | M      | 46          | 622                        | 1.08    | 848.00          | No        |
| HIV51    | PBMC     | M      | 25          | 147                        | 0.13    | 114,750.00      | No        |
| HIV52    | LN       | M      | 29          | 334                        | 0.21    | 203,393.00      | No        |
| HC1      | LN       | M      | 1           | NA                         | NA      | NA              | NA        |
| HC2      | LN       | F      | 41          | NA                         | NA      | NA              | NA        |
| HC3      | LN       | M      | 58          | NA                         | NA      | NA              | NA        |
| HC4      | LN       | M      | 18          | NA                         | NA      | NA              | NA        |
| HC5      | LN       | M      | 3           | NA                         | NA      | NA              | NA        |
| HC6      | LN       | M      | 55          | NA                         | NA      | NA              | NA        |
| HC7      | LN       | F      | 37          | NA                         | NA      | NA              | NA        |

Table S2: CyTOF antibody panels, related to Figures 1-3.

| Panel 1            |       |             |                | Panel 2 (Wendel et al., 2018) |       |             |             |
|--------------------|-------|-------------|----------------|-------------------------------|-------|-------------|-------------|
| Antibody           | Metal | Clone       | Vendor         | antibodies                    | metal | clone       | Vendor      |
| CD57               | 113   | HCD57       | Biologend      | CD57                          | 113   | HCD57       | Biologend   |
| CD3                | 141   | UCHT1       | BD             | CD3                           | 141   | UCHT1       | BD          |
| CD5                | 142   | UCHT2       | Biologend      | CD5                           | 142   | UCHT2       | Biologend   |
| CD8                | 143   | SK1         | Biologend      | CD8                           | 143   | SK1         | Biologend   |
| CD4                | 144   | SK3         | Biologend      | CD4                           | 144   | SK3         | Biologend   |
| CD19               | 145   | HIB19       | Biologend      | CD19                          | 145   | HIB19       | Biologend   |
| Granzyme B         | 146   | CLB-GB11    | eBioscience    | IgD                           | 146   | IA6-2       | Biologend   |
| IFN- $\gamma$      | 147   | 4S.B3       | eBioscience    | IFN- $\gamma$                 | 147   | 4S.B3       | eBioscience |
| HLA-DR             | 148   | L243        | biologend      | CCR6                          | 148   | G034E3      | Biologend   |
| CD14               | 149   | M5E2        | Bio Legend     | CD14                          | 149   | M5E2        | Biologend   |
| CD69               | 150   | FN50        | Biologend      | CD69                          | 150   | FN50        | Biologend   |
| CD38               | 151   | HB-7        | Biologend      | Granzyme A                    | 151   | CB9         | Biologend   |
| TNF- $\alpha$      | 152   | MAb11       | biologend      | TNF- $\alpha$                 | 152   | MAb11       | Biologend   |
| CD45RO             | 153   | UCHL1       | biologend      | CD45RO                        | 153   | UCHL1       | Biologend   |
| CD27               | 154   | LG.7F9      | eBioscience    | CD27                          | 154   | LG.7F9      | eBioscience |
| TCR $\alpha\beta$  | 155   | T10B9.1A-31 | BD             | TCRab                         | 155   | T10B9.1A-31 | BD          |
| CCR5               | 156   | J418F1      | Biologend      | CCR5                          | 156   | J418F1      | Biologend   |
|                    | 157   |             |                | Ki67                          | 157   | B56         | BD          |
| CD71               | 158   | CY1G4       | biologend      | BLYS                          | 158   | 1D6         | Biologend   |
| CXCR4              | 159   | 12G5        | biologend      | BCL6                          | 159   | K112-91     | BD          |
| IL-4               | 160   | 8D4-8       | BD             | IL-4                          | 160   | 8D4-8       | BD          |
| CD25               | 161   | M-A251      | BD             | CD25                          | 161   | M-A251      | BD          |
| IL-2               | 162   | MQ1-17H12   | biologend      | Eomes                         | 162   | wd1928      | eBioscience |
| ICOS               | 163   | c398-4A     | biologend      | ICOS                          | 163   | c398-4A     | Biologend   |
| Ki67               | 164   | B56         | BD             | IL-5                          | 164   | TRFK5       | Biologend   |
| Foxp3              | 165   | PCH101      | ebiosciences   | Foxp3                         | 165   | PCH101      | eBioscience |
| TCF1               | 166   | C63D9       | Cell Signaling | CD95                          | 166   | DX2         | Biologend   |
| PD-1               | 167   | EH12.2H7    | Biologend      | CD45RA                        | 167   | HI100       | eBioscience |
| CCR7               | 168   | G043H7      | biologend      | CCR7                          | 168   | G043H7      | Biologend   |
| CXCR5              | 169   | RF8B2       | BD             | CXCR5                         | 169   | RF8B2       | BD          |
| TCR $\gamma\delta$ | 170   | SA6.E9      | invitrogen     | T-bet                         | 170   | 4B10        | Biologend   |
| CD103              | 171   | B-Ly7       | ebioscience    | PD-1                          | 171   | EH12.2H7    | Biologend   |
| CCR4               | 172   | 1G1         | BD             | IL-21                         | 172   | 3A3-N2      | Biologend   |
| CCR6               | 173   | G034E3      | biologend      | IL-2                          | 173   | MQ1-17H12   | eBioscience |
| IL-13              | 174   | JES10-5A2   | biologend      | CD24                          | 174   | ML5         | Biologend   |
| Perforin           | 175   | DG9         | biologend      | CXCR3                         | 175   | G025H7      | Biologend   |
| IL-17A             | 176   | BL168       | Biologend      | CD38                          | 176   | HIT2        | Biologend   |

Table S3: Cell and transcript counts for sequencing experiments, related to Figures 5-7.

| Donor ID | Assay Type | T cell Population | Source | Cell count | Mapped reads after QC | Donor ID | Assay Type | T cell Population | Source | Cell count | Mapped reads after QC |
|----------|------------|-------------------|--------|------------|-----------------------|----------|------------|-------------------|--------|------------|-----------------------|
| HIV15    | ATAC-seq   | CXCR5-PD-1-ICOS-  | LN     | 20000      | 135508401             | HIV12    | TCR-seq    | CXCR5-PD-1-ICOS-  | LN     | 10000      | 5992                  |
| HIV16    | ATAC-seq   | CXCR5-PD-1-ICOS-  | LN     | 17544      | 52354592              | HIV13    | TCR-seq    | CXCR5-PD-1-ICOS-  | LN     | 10000      | 6533                  |
| HIV21    | ATAC-seq   | CXCR5-PD-1-ICOS-  | LN     | 20000      | 53542641              | HIV17    | TCR-seq    | CXCR5-PD-1-ICOS-  | LN     | 10000      | 8945                  |
| HIV4     | ATAC-seq   | CXCR5-PD-1-ICOS-  | LN     | 10000      | 49048896              | HIV2     | TCR-seq    | CXCR5-PD-1-ICOS-  | LN     | 10000      | 8777                  |
| HIV45    | ATAC-seq   | CXCR5-PD-1-ICOS-  | LN     | 20000      | 50769892              | HIV23    | TCR-seq    | CXCR5-PD-1-ICOS-  | LN     | 10000      | 7503                  |
| HIV46    | ATAC-seq   | CXCR5-PD-1-ICOS-  | LN     | 20000      | 52949511              | HIV28    | TCR-seq    | CXCR5-PD-1-ICOS-  | LN     | 10000      | 2821                  |
| HIV15    | ATAC-seq   | CXCR5-PD-1+ICOS+  | LN     | 20000      | 76611947              | HIV39    | TCR-seq    | CXCR5-PD-1-ICOS-  | LN     | 10000      | 9033                  |
| HIV16    | ATAC-seq   | CXCR5-PD-1+ICOS+  | LN     | 20000      | 51161176              | HIV41    | TCR-seq    | CXCR5-PD-1-ICOS-  | LN     | 10000      | 6254                  |
| HIV21    | ATAC-seq   | CXCR5-PD-1+ICOS+  | LN     | 20000      | 47122262              | HIV52    | TCR-seq    | CXCR5-PD-1-ICOS-  | LN     | 10000      | 6315                  |
| HIV4     | ATAC-seq   | CXCR5-PD-1+ICOS+  | LN     | 10000      | 40979805              | HIV12    | TCR-seq    | CXCR5-PD-1+ICOS+  | LN     | 2500       | 3366                  |
| HIV45    | ATAC-seq   | CXCR5-PD-1+ICOS+  | LN     | 17365      | 75578156              | HIV13    | TCR-seq    | CXCR5-PD-1+ICOS+  | LN     | 2500       | 4546                  |
| HIV46    | ATAC-seq   | CXCR5-PD-1+ICOS+  | LN     | 20000      | 116645531             | HIV17    | TCR-seq    | CXCR5-PD-1+ICOS+  | LN     | 2500       | 2836                  |
| HIV15    | ATAC-seq   | naïve             | LN     | 20000      | 50100923              | HIV2     | TCR-seq    | CXCR5-PD-1+ICOS+  | LN     | 5000       | 3182                  |
| HIV16    | ATAC-seq   | naïve             | LN     | 20000      | 50541268              | HIV23    | TCR-seq    | CXCR5-PD-1+ICOS+  | LN     | 2500       | 2552                  |
| HIV21    | ATAC-seq   | naïve             | LN     | 20000      | 43842949              | HIV28    | TCR-seq    | CXCR5-PD-1+ICOS+  | LN     | 2515       | 2708                  |
| HIV4     | ATAC-seq   | naïve             | LN     | 10000      | 41241783              | HIV39    | TCR-seq    | CXCR5-PD-1+ICOS+  | LN     | 4085       | 3542                  |
| HIV45    | ATAC-seq   | naïve             | LN     | 20000      | 90993949              | HIV41    | TCR-seq    | CXCR5-PD-1+ICOS+  | LN     | 10000      | 10290                 |
| HIV46    | ATAC-seq   | naïve             | LN     | 20000      | 49421306              | HIV52    | TCR-seq    | CXCR5-PD-1+ICOS+  | LN     | 7500       | 7960                  |
| HIV15    | ATAC-seq   | TFH               | LN     | 20000      | 85765124              | HIV12    | TCR-seq    | naïve             | LN     | 10000      | 13225                 |
| HIV16    | ATAC-seq   | TFH               | LN     | 20000      | 51623107              | HIV13    | TCR-seq    | naïve             | LN     | 10000      | 18376                 |
| HIV21    | ATAC-seq   | TFH               | LN     | 20000      | 51243858              | HIV17    | TCR-seq    | naïve             | LN     | 10000      | 6750                  |
| HIV4     | ATAC-seq   | TFH               | LN     | 3122       | 44084338              | HIV2     | TCR-seq    | naïve             | LN     | 5000       | 3502                  |
| HIV45    | ATAC-seq   | TFH               | LN     | 6717       | 59274617              | HIV23    | TCR-seq    | naïve             | LN     | 10000      | 10404                 |
| HIV46    | ATAC-seq   | TFH               | LN     | 20000      | 39057907              | HIV28    | TCR-seq    | naïve             | LN     | 10000      | 5488                  |
| HIV15    | RNA-seq    | CXCR5-PD-1-ICOS-  | LN     | 5000       | 118141653             | HIV39    | TCR-seq    | naïve             | LN     | 10000      | 4314                  |
| HIV16    | RNA-seq    | CXCR5-PD-1-ICOS-  | LN     | 5000       | 63511176              | HIV41    | TCR-seq    | naïve             | LN     | 10000      | 5822                  |
| HIV21    | RNA-seq    | CXCR5-PD-1-ICOS-  | LN     | 5000       | 71005274              | HIV52    | TCR-seq    | naïve             | LN     | 10000      | 14420                 |
| HIV4     | RNA-seq    | CXCR5-PD-1-ICOS-  | LN     | 5000       | 61506370              | HIV12    | TCR-seq    | TFH               | LN     | 10000      | 9804                  |
| HIV45    | RNA-seq    | CXCR5-PD-1-ICOS-  | LN     | 5000       | 97776218              | HIV13    | TCR-seq    | TFH               | LN     | 10000      | 17659                 |
| HIV46    | RNA-seq    | CXCR5-PD-1-ICOS-  | LN     | 5000       | 44654834              | HIV17    | TCR-seq    | TFH               | LN     | 8758       | 8936                  |
| HIV15    | RNA-seq    | CXCR5-PD-1+ICOS+  | LN     | 5000       | 93246500              | HIV2     | TCR-seq    | TFH               | LN     | 10000      | 10900                 |
| HIV16    | RNA-seq    | CXCR5-PD-1+ICOS+  | LN     | 5000       | 63075958              | HIV23    | TCR-seq    | TFH               | LN     | 10230      | 8052                  |
| HIV21    | RNA-seq    | CXCR5-PD-1+ICOS+  | LN     | 5000       | 67697670              | HIV28    | TCR-seq    | TFH               | LN     | 2500       | 4135                  |
| HIV4     | RNA-seq    | CXCR5-PD-1+ICOS+  | LN     | 5000       | 51941772              | HIV39    | TCR-seq    | TFH               | LN     | 5000       | 19342                 |
| HIV45    | RNA-seq    | CXCR5-PD-1+ICOS+  | LN     | 5000       | 102956361             | HIV41    | TCR-seq    | TFH               | LN     | 10000      | 10167                 |
| HIV46    | RNA-seq    | CXCR5-PD-1+ICOS+  | LN     | 5000       | 46350154              | HIV52    | TCR-seq    | TFH               | LN     | 2500       | 2723                  |
| HIV15    | RNA-seq    | naïve             | LN     | 5000       | 75327804              | HIV13    | TCR-seq    | CXCR5-PD-1+ICOS+  | PBMC   | 2500       | 3374                  |
| HIV16    | RNA-seq    | naïve             | LN     | 5000       | 55014596              | HIV17    | TCR-seq    | CXCR5-PD-1+ICOS+  | PBMC   | 293        | 496                   |
| HIV21    | RNA-seq    | naïve             | LN     | 5000       | 62263436              | HIV2     | TCR-seq    | CXCR5-PD-1+ICOS+  | PBMC   | 2500       | 1711                  |
| HIV4     | RNA-seq    | naïve             | LN     | 5000       | 53756662              | HIV28    | TCR-seq    | CXCR5-PD-1+ICOS+  | PBMC   | 2267       | 3016                  |
| HIV45    | RNA-seq    | naïve             | LN     | 5000       | 86859878              | HIV39    | TCR-seq    | CXCR5-PD-1+ICOS+  | PBMC   | 4487       | 4536                  |
| HIV46    | RNA-seq    | naïve             | LN     | 5000       | 39353435              | HIV41    | TCR-seq    | CXCR5-PD-1+ICOS+  | PBMC   | 5000       | 6640                  |
| HIV15    | RNA-seq    | TFH               | LN     | 5000       | 126979175             |          |            |                   |        |            |                       |
| HIV16    | RNA-seq    | TFH               | LN     | 5000       | 60580898              |          |            |                   |        |            |                       |
| HIV21    | RNA-seq    | TFH               | LN     | 5000       | 63604304              |          |            |                   |        |            |                       |
| HIV4     | RNA-seq    | TFH               | LN     | 5000       | 50051284              |          |            |                   |        |            |                       |
| HIV45    | RNA-seq    | TFH               | LN     | 5000       | 89300563              |          |            |                   |        |            |                       |
| HIV46    | RNA-seq    | TFH               | LN     | 5000       | 64097025              |          |            |                   |        |            |                       |

Table S4: TCR $\beta$  sequencing primers, related to Figures 5 and 7.

|                                      |                                                                                                          |
|--------------------------------------|----------------------------------------------------------------------------------------------------------|
| <b>Reverse Transcription primer:</b> | RT                                                                                                       |
|                                      | ACACTCTTTCCCTACACGACGCTCTTCCGATCT NNNNNNNNNNNN GACCTCGGGTGGGAACAC (N indicates random molecular barcode) |
| <b>1st PCR Primers:</b>              | 1st PCR Reverse:                                                                                         |
|                                      | ACACTCTTTCCCTACACGAC                                                                                     |
|                                      | 1st PCR Forward:                                                                                         |
| TRBV1                                | GACGTGTGCTCTTCCGATCTCTGACAGCTCTCGTTATACCTTCA                                                             |
| TRBV2                                | GACGTGTGCTCTTCCGATCTGCCTGATGGATCAAATTTCACTCTG                                                            |
| TRBV3                                | GACGTGTGCTCTTCCGATCTAATGAAACAGTTCCAAATCGMTTCT                                                            |
| TRBV4                                | GACGTGTGCTCTTCCGATCTCCAAGTCGCTTCTCACCTGAAT                                                               |
| TRBV5-1                              | GACGTGTGCTCTTCCGATCTCGCCAGTTCTCTAACTCTCGCTCT                                                             |
| TRBV5-2                              | GACGTGTGCTCTTCCGATCTTACTGAGTCAAACACGGAGCTAGG                                                             |
| TRBV5-3                              | GACGTGTGCTCTTCCGATCTCTCTGAGATGAATGTGAGTGCCTTG                                                            |
| TRBV5-4/5/6/7/8                      | GACGTGTGCTCTTCCGATCTCTGAGCTGAATGTGAACGCCTTG                                                              |
| TRBV6-1                              | GACGTGTGCTCTTCCGATCTTCTCCAGATTAACAACCGGGAGTT                                                             |
| TRBV6-2/3                            | GACGTGTGCTCTTCCGATCTCTGATGGCTACAATGTCTCCAGATT                                                            |
| TRBV6-4                              | GACGTGTGCTCTTCCGATCTAGTGTCTCCAGAGCAAACACAGATG                                                            |
| TRBV6-5/6/7                          | GACGTGTGCTCTTCCGATCTGTCTCCAGATCAAMCAGAGGATT                                                              |
| TRBV6-8/9                            | GACGTGTGCTCTTCCGATCTAAACACAGAGGATTTCCCRCTCAG                                                             |
| TRBV7-1                              | GACGTGTGCTCTTCCGATCTGTCTGAGGGATCCATCTCCACTC                                                              |
| TRBV7-2                              | GACGTGTGCTCTTCCGATCTTCGCTTCTCTGCAGAGAGGACTGG                                                             |
| TRBV7-3                              | GACGTGTGCTCTTCCGATCTCTGAGGGATCCGTCTCTACTCTGAA                                                            |
| TRBV7-4/8                            | GACGTGTGCTCTTCCGATCTCTGAGRGATCCGTCTCCACTCTG                                                              |
| TRBV7-5                              | GACGTGTGCTCTTCCGATCTGGTCTGAGGATCTTCTCCACCT                                                               |
| TRBV7-6/7                            | GACGTGTGCTCTTCCGATCTGAGGGATCCATCTCCACTCTGAC                                                              |
| TRBV7-9                              | GACGTGTGCTCTTCCGATCTCTGCAGAGAGCCCTAAGGGATCT                                                              |
| TRBV8-1                              | GACGTGTGCTCTTCCGATCTAAGCTCAAGCATTTTCCCTCAAC                                                              |
| TRBV8-2                              | GACGTGTGCTCTTCCGATCTATGTCACAGAGGGTACTGTGTTTC                                                             |
| TRBV-9                               | GACGTGTGCTCTTCCGATCTACAGTCCCTGACTTGCACTCTG                                                               |
| TRBV10-1/3                           | GACGTGTGCTCTTCCGATCTACAAAGGAGAAGTCTCAGATGGCTA                                                            |
| TRBV10-2                             | GACGTGTGCTCTTCCGATCTTGTCTCCAGATCCAAGACAGAGAA                                                             |
| TRBV11                               | GACGTGTGCTCTTCCGATCTCTGCAGAGAGGCTCAAAGGAGTAG                                                             |
| TRBV12-1/2                           | GACGTGTGCTCTTCCGATCTATCATTCTCYACTCTGAGGATCCAR                                                            |
| TRBV12-3/4/5                         | GACGTGTGCTCTTCCGATCTACTCTGARGATCCAGCCCTCAGAAC                                                            |
| TRBV13                               | GACGTGTGCTCTTCCGATCTCAGCTCAACAGTTCAAGTACTATCAT                                                           |
| TRBV14                               | GACGTGTGCTCTTCCGATCTGAAAGGACTGGAGGACGTATTCTA                                                             |
| TRBV15                               | GACGTGTGCTCTTCCGATCTGCCGAACACTTCTTTCTGCTTTCT                                                             |
| TRBV16                               | GACGTGTGCTCTTCCGATCTATTTTCAGCTAAGTGCCTCCCAAAT                                                            |
| TRBV17                               | GACGTGTGCTCTTCCGATCTCACAGCTGAAAGACCTAACGGAAC                                                             |
| TRBV18                               | GACGTGTGCTCTTCCGATCTATTTCTGCTGAATTTCCCAAAGAG                                                             |
| TRBV19                               | GACGTGTGCTCTTCCGATCTGTCTCTCGGGAGAAGAAGGAATC                                                              |
| TRBV20-1                             | GACGTGTGCTCTTCCGATCTGACAAGTTTCTCATCAACCATGCAA                                                            |
| TRBV21-1                             | GACGTGTGCTCTTCCGATCTCAATGCTCCAAAACTCATCCTGT                                                              |
| TRBV22-1                             | GACGTGTGCTCTTCCGATCTAGGAGAAGGGGCTATTTCTTCTCAG                                                            |
| TRBV23-1                             | GACGTGTGCTCTTCCGATCTATTCTCATCTCAATGCCCAAGAAC                                                             |
| TRBV24-1                             | GACGTGTGCTCTTCCGATCTGCAGGCACAGGCTAAATTCTCC                                                               |
| TRBV25-1                             | GACGTGTGCTCTTCCGATCTAGTCTCCAGAATAAGGACGGAGCAT                                                            |
| TRBV26                               | GACGTGTGCTCTTCCGATCTCTCTGAGGGGATCATGTTTCTTGA                                                             |
| TRBV27                               | GACGTGTGCTCTTCCGATCTCAAAGTCTCTCGAAAAGAGAAGAGGA                                                           |
| TRBV28                               | GACGTGTGCTCTTCCGATCTAAGAAGGAGCGCTTCTCCCTGATT                                                             |
| TRBV29-1                             | GACGTGTGCTCTTCCGATCTCGCCCAAACCTAACATTCTCAA                                                               |
| TRBV30                               | GACGTGTGCTCTTCCGATCTCCAGAATCTCTCAGCCTCCAGAC                                                              |
| <b>2nd PCR Primers:</b>              | 2nd PCR Reverse:                                                                                         |
|                                      | AATGATACGGCGACCACCGAGATCTACACTCTTCCCTACACGAC                                                             |
|                                      | 2nd PCR Forward:                                                                                         |
|                                      | CAAGCAGAAGACGCATACGAGATAA XXXXXX GTGACTGGAGTTCAGACGTGTGCTCTTCCGATCT (X indicates fixed library index)    |

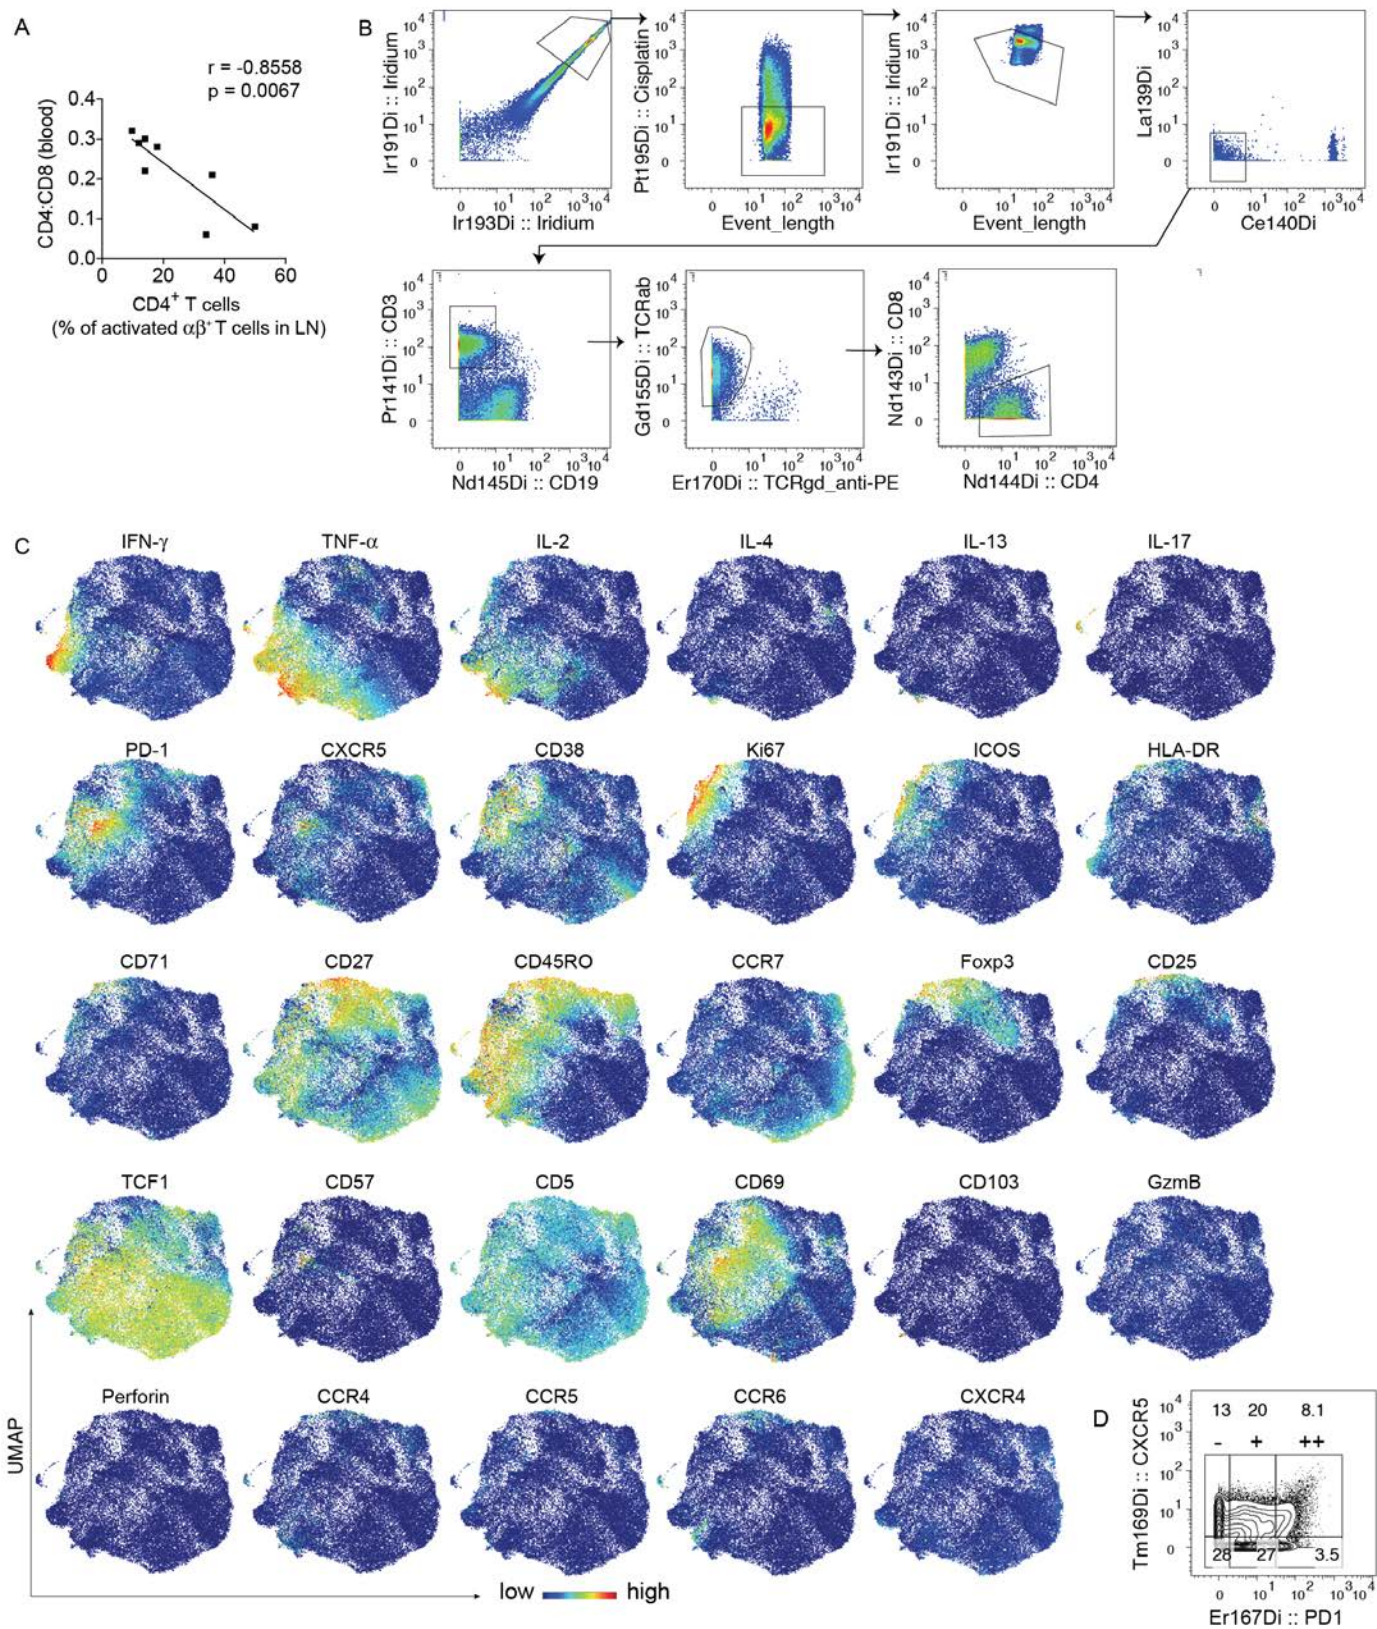

Figure S1: High-dimensional analyses of activated CD4<sup>+</sup> T cells in HIV infected LNs by CyTOF, related to Figure 1.

(A) Correlation between peripheral CD4:CD8 ratio and the frequency of CD38<sup>+</sup>HLA-DR<sup>+</sup>CD4<sup>+</sup> T cells in the LNs. Association was measured by Pearson correlation and the best-fitting line was calculated using least squares fit regression (B) Representative plots showing gating strategy for identifying the input CD4<sup>+</sup> T cells used for CyTOF analyses. (C) UMAP displays of individual markers as indicated. Markers used to select input cells were excluded. Plots combined CD4<sup>+</sup> T cells from 8 HIV LN samples. (D) Plots showing CXCR5 and PD-1 expression and the subdivision of CD4<sup>+</sup> T cells by the intensity of CXCR5 and PD-1 staining in the CyTOF analyses.



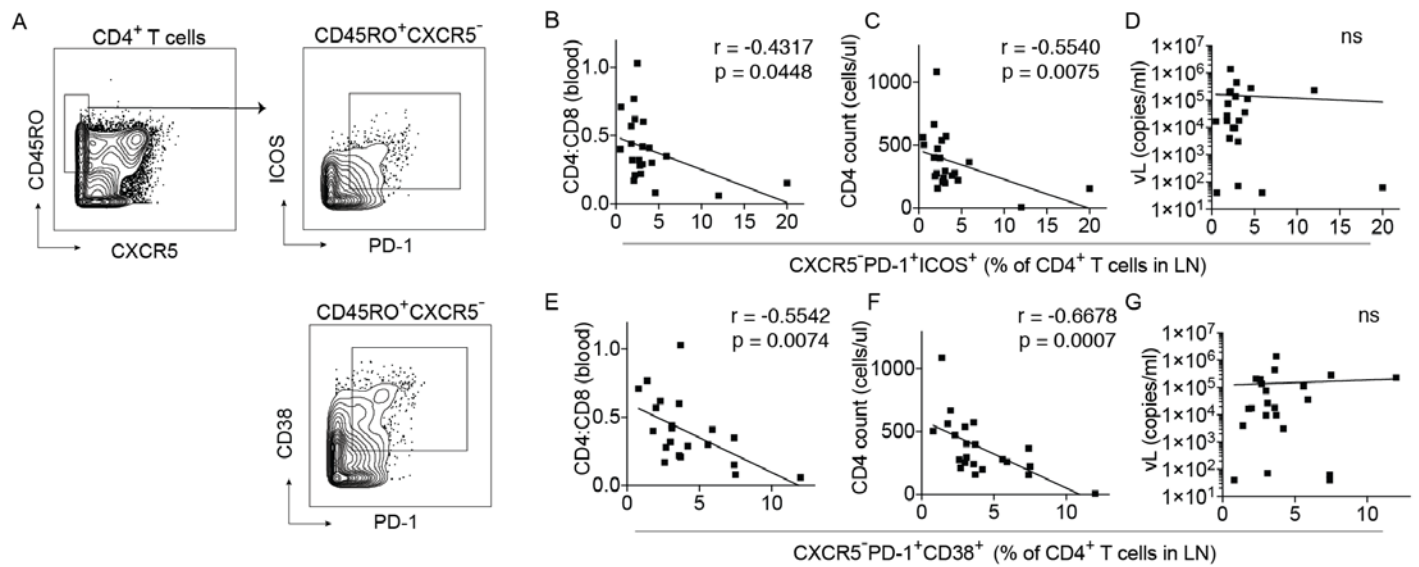

Figure S2: Correlation between subsets of CXCR5<sup>-</sup> CD4<sup>+</sup> T cells and clinical parameters of HIV infection, related to Figure 1.

(A) Plots showing representative staining and gates for identifying CXCR5<sup>-</sup>PD-1<sup>+</sup>ICOS<sup>+</sup> T cells (top) or CXCR5<sup>-</sup>PD-1<sup>+</sup>CD38<sup>+</sup> T cells (bottom). (B-D) The frequency of CXCR5<sup>-</sup>PD-1<sup>+</sup>ICOS<sup>+</sup> T cells in the LN is associated with CD4:CD8 ratio (B), CD4<sup>+</sup> T cell count (C) but not with viral load (D). (E-G) The frequency of CXCR5<sup>-</sup>PD-1<sup>+</sup>CD38<sup>+</sup> T cells in the LN is associated with CD4:CD8 ratio (E), CD4<sup>+</sup> T cell count (F) but not with viral load (G). Data include 22 HIV LN samples. Association was measured by Spearman or Pearson correlation, depending on normality of the data as determined by D'Agostino & Pearson omnibus normality test. The best-fitting line was calculated using least squares fit regression.

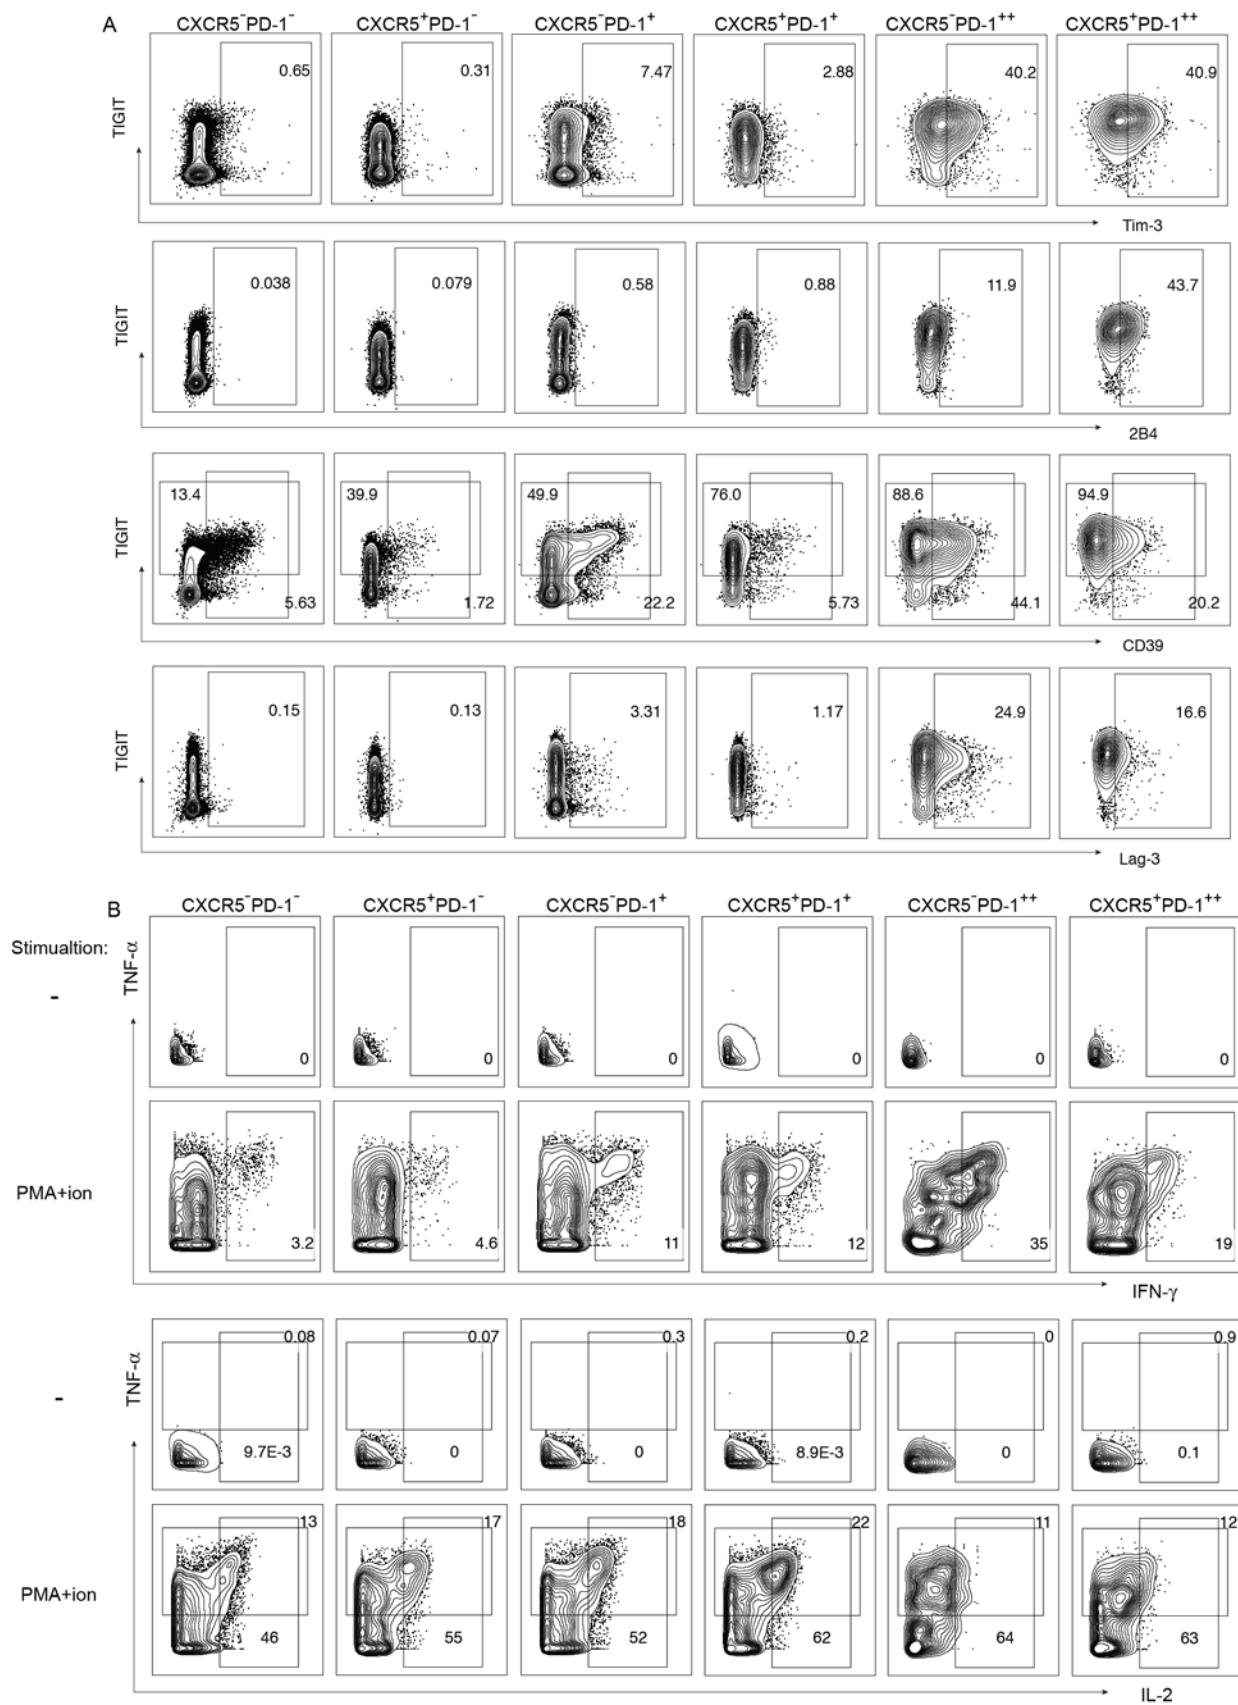

Figure S3: Co-inhibitory receptor expression and cytokine producing function of CD4<sup>+</sup> T cell subsets in LNs, related to Figure 2.

(A) Plots showing expression of Tim-3, 2B4, CD39, Lag-3, and TIGIT on CD4<sup>+</sup> T cell subsets. (B) Plots showing Boolean gates applied on each CD4<sup>+</sup> T cell subset for the indicated cytokines with or without T cell stimulation. Plots are representative of data from 8 HIV LN samples acquired by flow cytometry (A) or CyTOF (B).

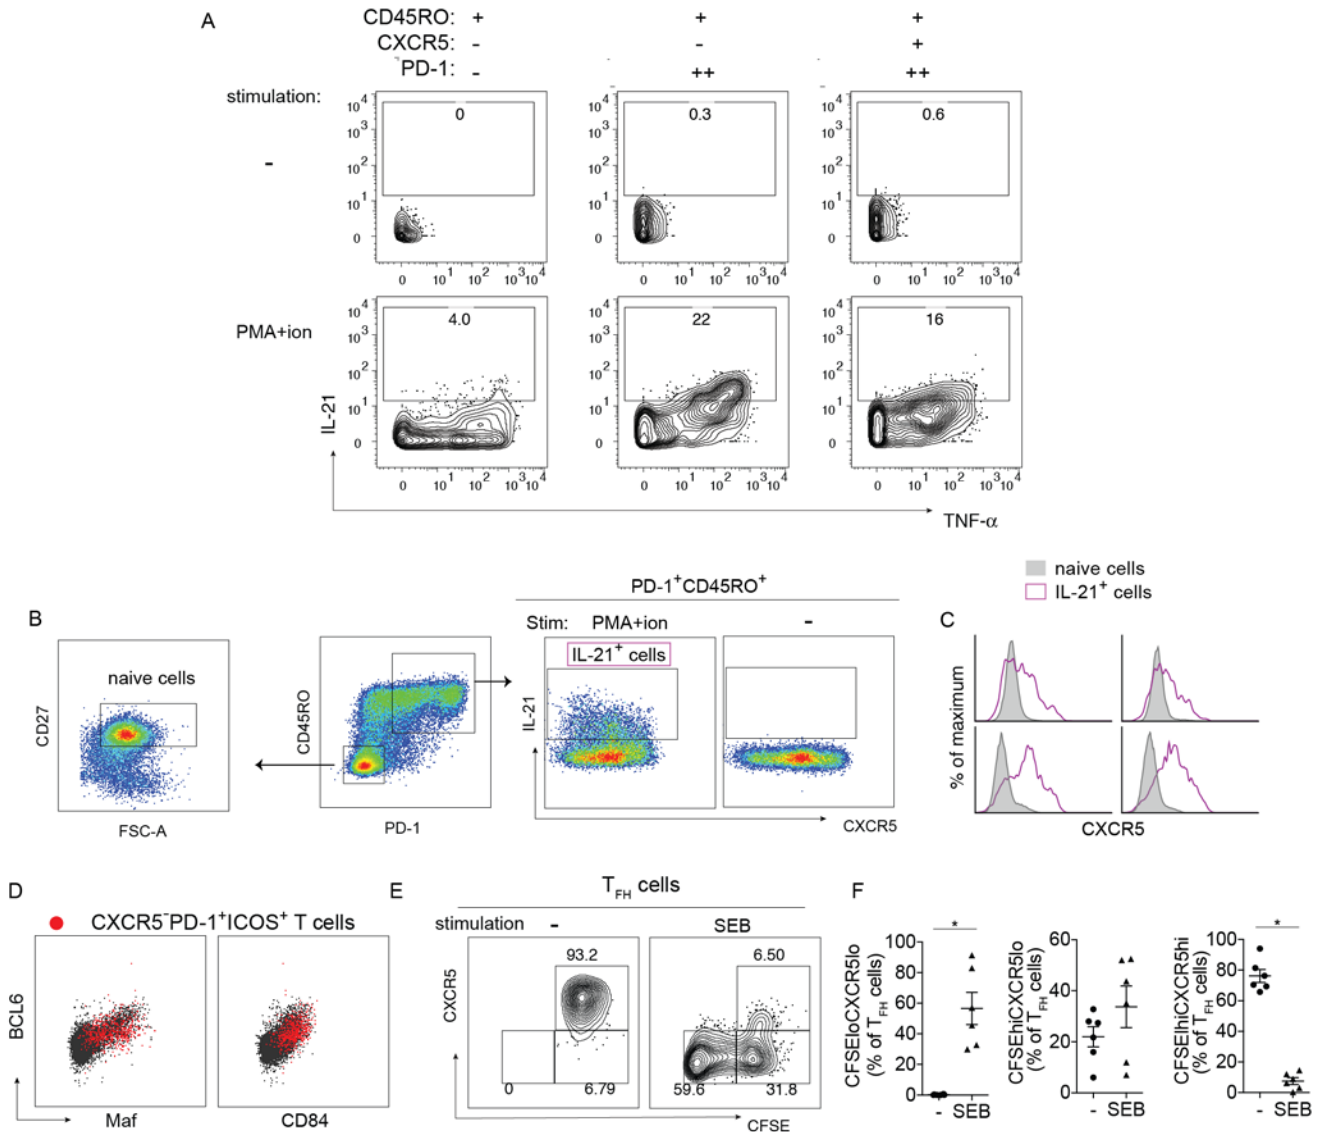

Figure S4: IL-21 production and T<sub>FH</sub> cell-associated protein expression, related to Figure 2, 3, and 5.

(A) Plots showing IL-21 staining on indicated cell subset with or without T cell stimulation by PMA and ionomycin. Data is representative of 25 LN samples acquired by CyTOF. (B-C) LN cells from 4 HIV<sup>+</sup> donors were assayed by flow cytometry for IL-21 expression. Representative plots showing a naïve cell gate and IL-21 expression on PD-1<sup>+</sup> memory T cells (B). IL-21<sup>+</sup> cells and naïve cells identified in B was used to generate histograms that compares the fluorescent intensity of CXCR5 staining (C). Each histogram represents data from one donor. (D) Plots showing overlay of CXCR5<sup>+</sup>PD-1<sup>+</sup>ICOS<sup>+</sup> T cells over bulk CD4<sup>+</sup> T cells for BCL6, Maf, and CD84 expression. (E) Plots showing CXCR5 staining on CFSE-labeled and sort purified T<sub>FH</sub> cells cultured in the presence or absence of SEB for 7 days. Cell division was measured by dilution of CFSE staining. (F) Scatter plots summarize the frequency of T<sub>FH</sub> cells that acquired the indicated staining pattern in stimulated versus unstimulated culture conditions from 6 samples. Wilcoxon matched-pairs signed rank test was used.

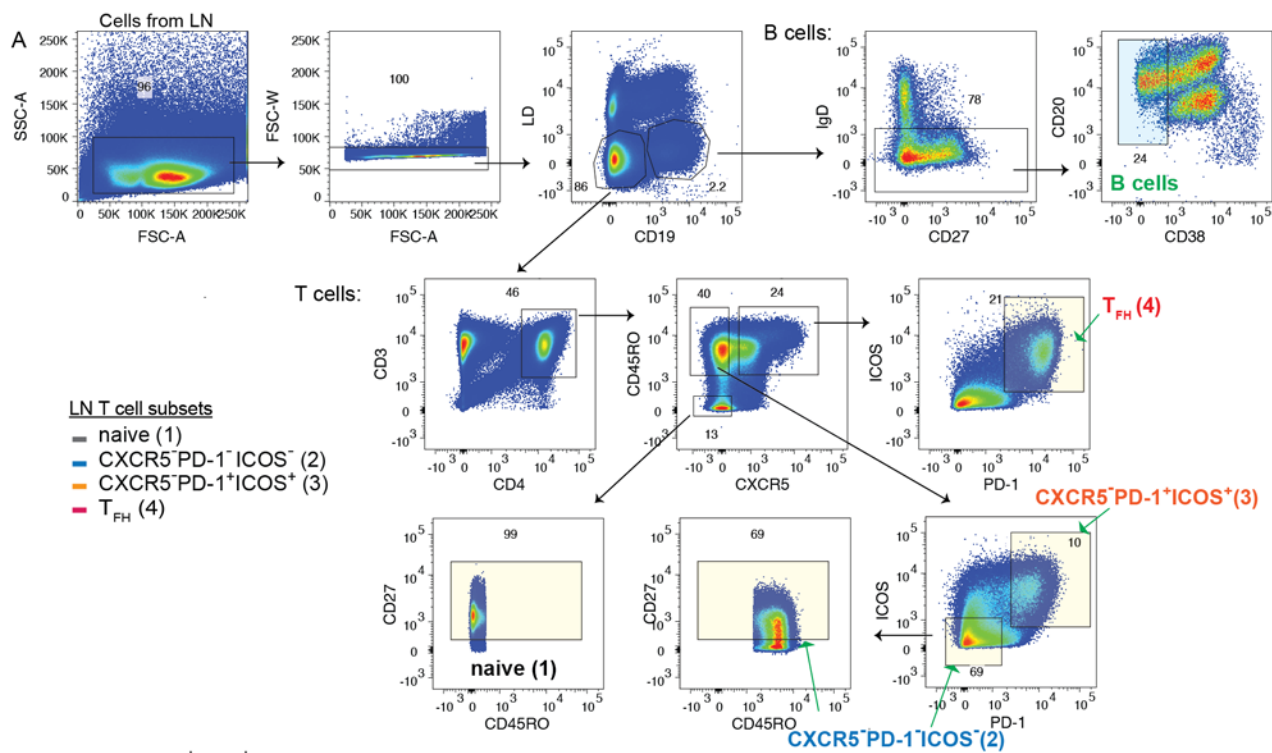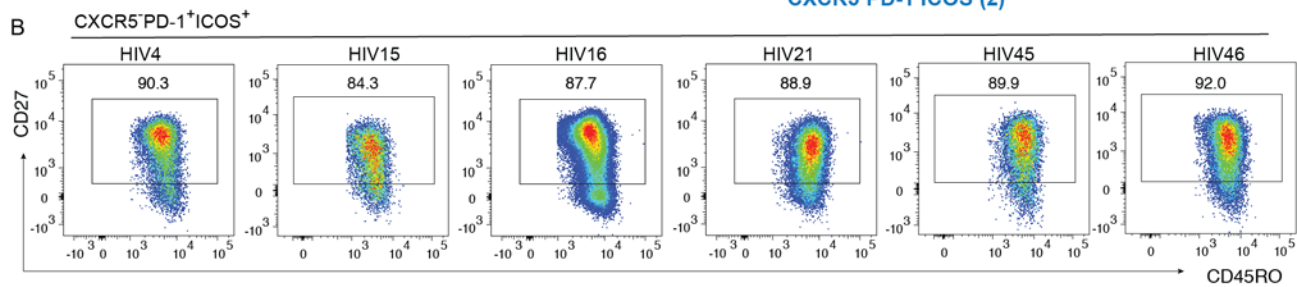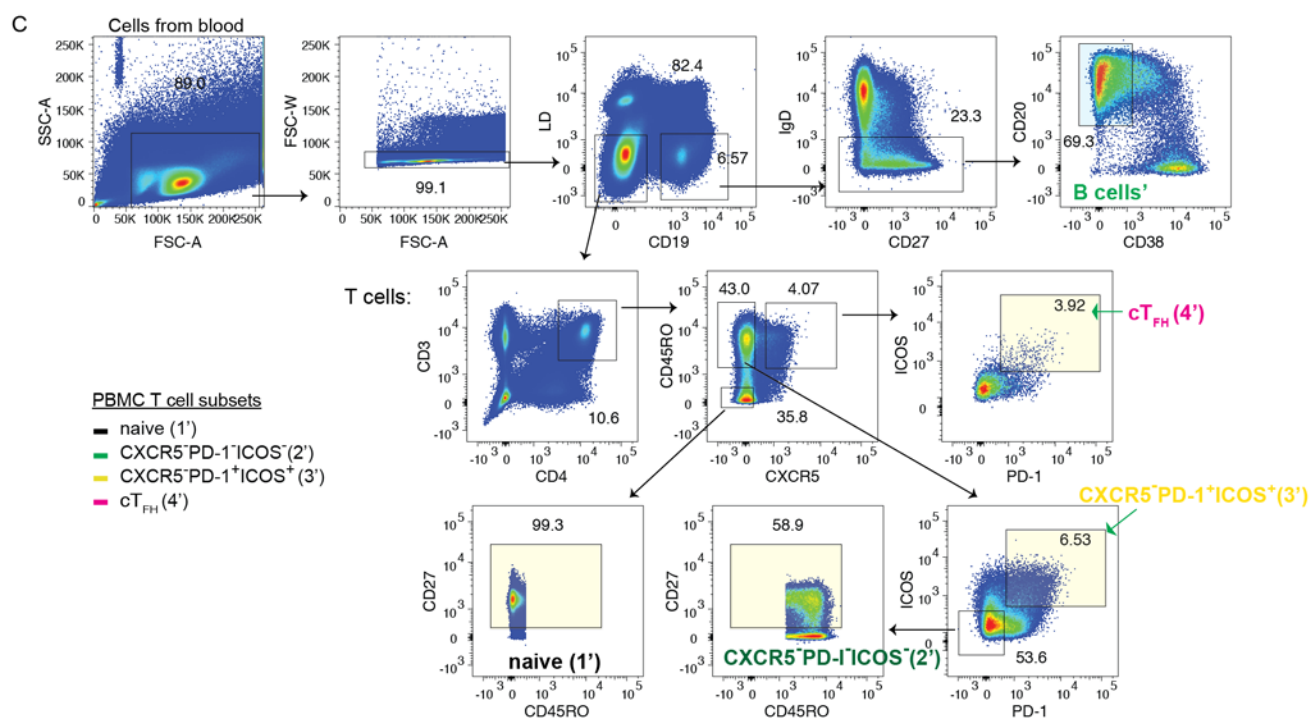

Figure S5: Gates used for the analyses of T cell and B cell subsets, related to Figure 3 and 5.

(A) Representative gates used for identification of T cell subsets (FACS analyses, coculture, TCR-seq, RNA-seq, ATAC-seq) and B cells (coculture) from the LN samples. CXCR5<sup>-</sup>PD-1<sup>-</sup>ICOS<sup>-</sup> T cells were gated on total ICOS<sup>-</sup>PD-1<sup>-</sup> subset except for RNA and ATAC-seq experiments, which was additionally gated on CD27. (B) CD27 antibody stained the majority of CXCR5<sup>-</sup>PD-1<sup>-</sup>ICOS<sup>-</sup> T cells. Plots show CD27 expression on CXCR5<sup>-</sup>PD-1<sup>-</sup>ICOS<sup>-</sup> T cells from the six samples used for transcriptomic and epigenetic analyses. (C) Representative gates used for sorting B cells and T cell subsets from the PBMC samples for coculture assays.

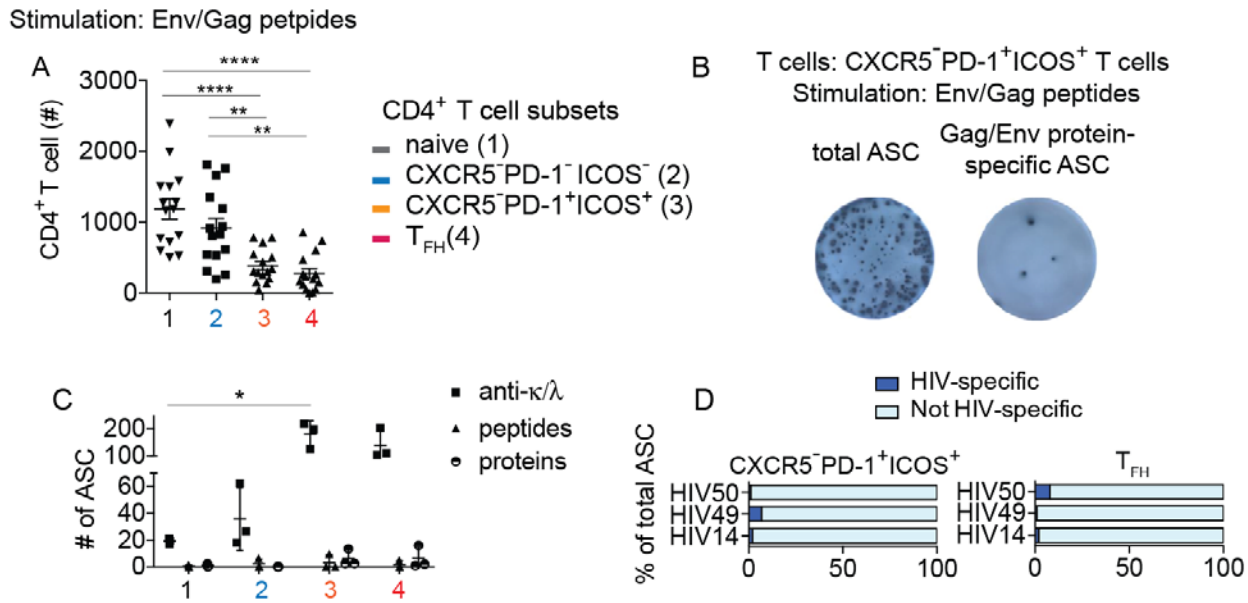

Figure S6: HIV-specific T cell stimulation and induction of B cell responses, related to Figure 4.

(A) Scatter plot quantifies the number of CD4<sup>+</sup> T cells in B: T cell cocultures after 7 days of Gag/Env peptide stimulation (n = 15 HIV LNs). (B) Representative detection of ASCs induced by HIV peptide stimulated CXCR5<sup>-</sup>PD-1<sup>+</sup>ICOS<sup>+</sup> T cells. Total ASCs were detected by plates coated with anti-kappa and lambda light chains (left). Plates coated with recombinant HIV proteins were used to detect HIV-specific ASCs (right). (C) Summary plot of total ASCs and antigen-specific ASCs that produced antibodies to HIV peptide or recombinant Gag/Env proteins. PBS coated wells were background subtracted from the data, with the minimum spot number set at 0. (D) Bar-graphs show Gag/Env protein-specific B cells as a percentage of total ASC in the presence of HIV peptide-stimulated CXCR5<sup>-</sup>PD-1<sup>+</sup>ICOS<sup>+</sup> T cells (left) or T<sub>FH</sub> cells (right). Each bar indicates one individual. For A and C, Friedman test was performed and corrected using Dunn's multiple comparisons test. C compares differences in total ASCs between subsets.



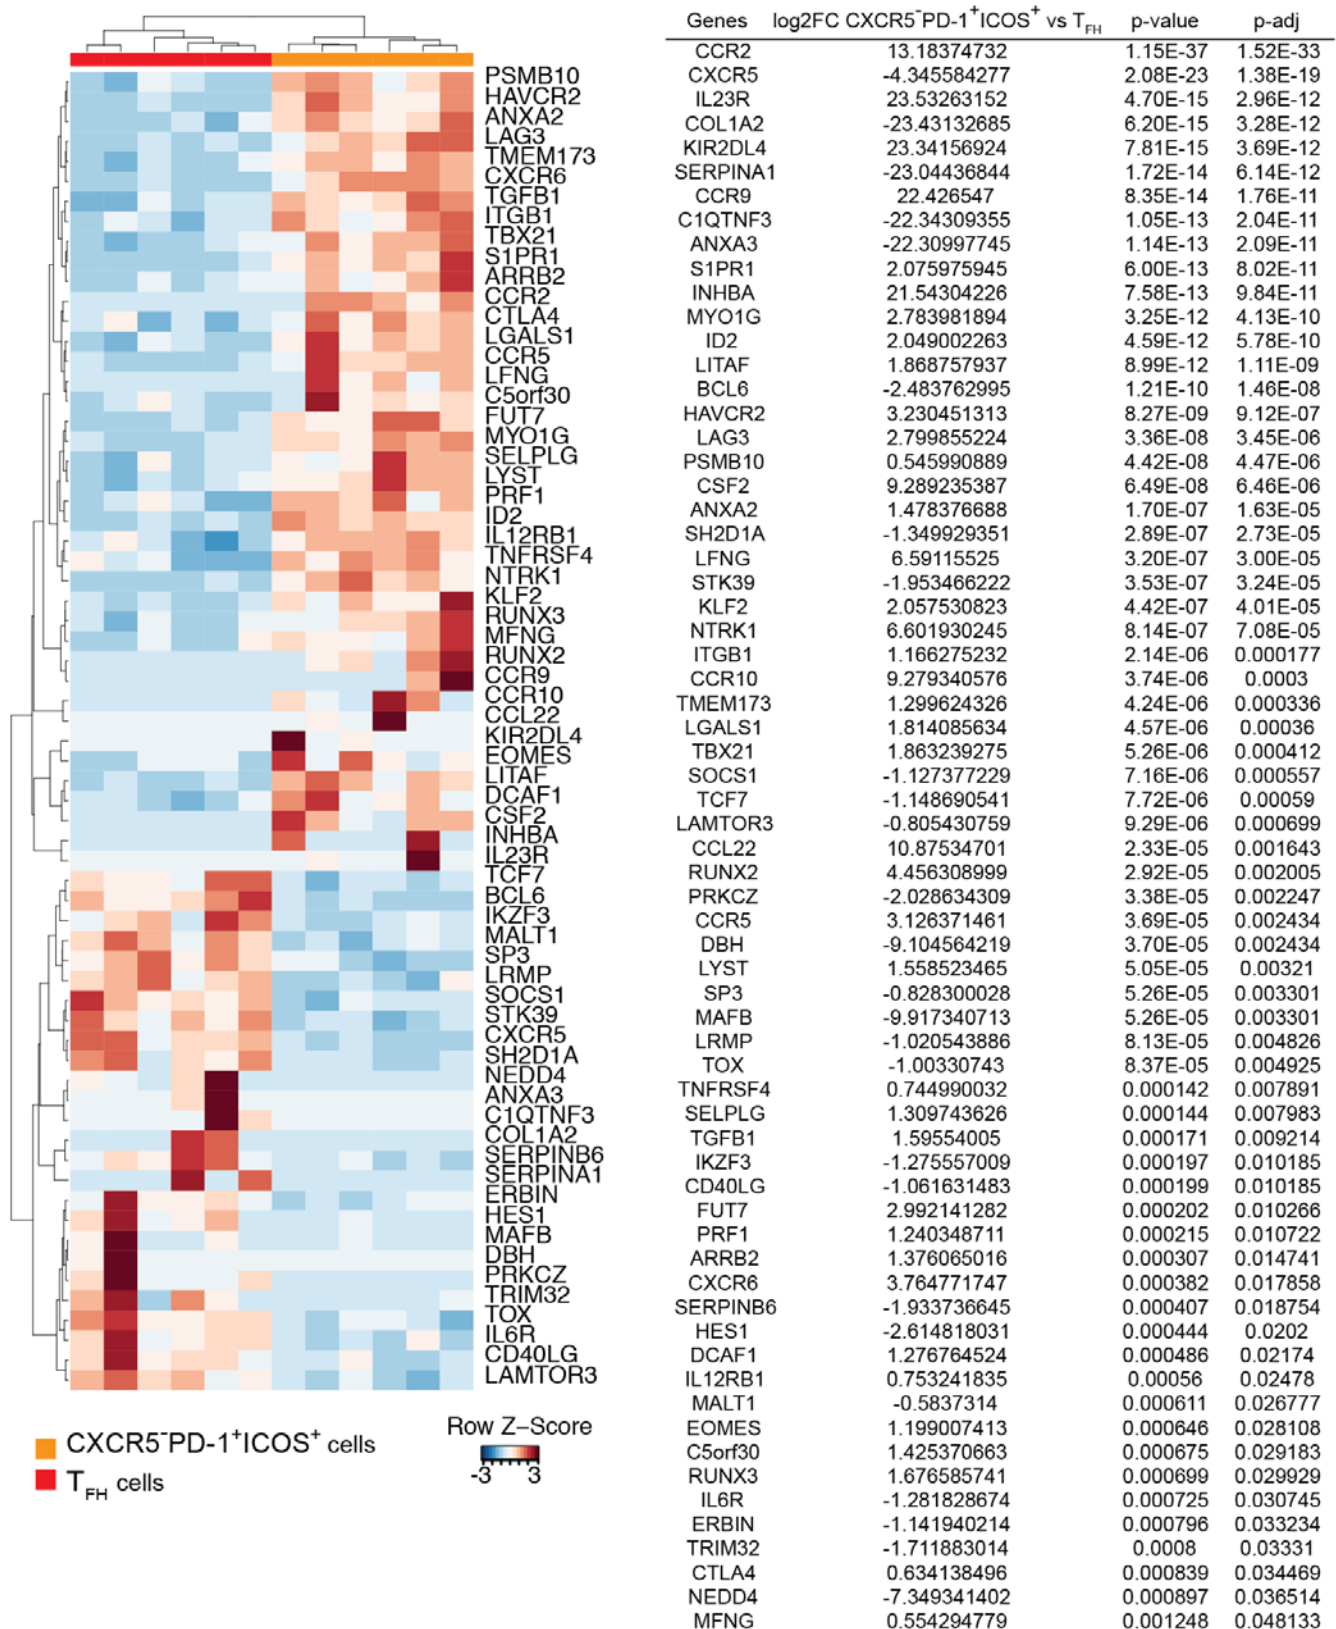

Figure S7: Transcriptomic analyses of CXCR5<sup>-</sup>PD-1<sup>+</sup>ICOS<sup>+</sup> T cells and T<sub>FH</sub> cells, related to Figure 6. Heatmap and table show the significantly differentially expressed genes between of CXCR5<sup>-</sup>PD-1<sup>+</sup>ICOS<sup>+</sup> T cells and T<sub>FH</sub> cells. Gene list included genes in the 8 differential GO terms. Expression values ordered by adjusted p-value were normalized and scaled with DESeq2.
